# Supplementary material
Source: publisher figshare collection journal article supplement (https://acs.figshare.com/ndownloader/files/17891255)
Supplement: Supplementary file 1 [file 17891255]

## Supporting Information for

### Infrared Spectroscopy of Gold Carbene Cation ( $\text{AuCH}_2^+$ ): Covalent or Dative Bonding?

P. B. Armentrout,<sup>†,\*</sup> Brandon C. Stevenson,<sup>†</sup> Fan Yang,<sup>†</sup> Frank J. Wensink,<sup>‡</sup> Olga V. Lushchikova,<sup>‡</sup> and Joost M. Bakker<sup>‡</sup>

<sup>†</sup>Department of Chemistry, University of Utah, 315 South 1400 East, Room 2020, Salt Lake City, Utah 84112, USA

<sup>‡</sup>Radboud University, Institute for Molecules and Materials, FELIX Laboratory, Toernooiveld 7, 6525 ED Nijmegen, The Netherlands

Table S1 provides information needed to calculate the rotational contours: dipole derivatives, principle axes, and moments of inertia of  $[\text{Au,C,2H}]^+$ . Figure S1 shows representative mass spectra of the ionic species formed from gold laser ablation in a flow of ethylene oxide mixed with He with and without laser irradiation at  $1010\text{ cm}^{-1}$ . Figure S2 illustrates the geometric orientation of the Cartesian principle axes used in the calculation of dipole derivatives and moments of inertia of the ground state of  $\text{AuCH}_2^+$ . Figure S3 shows the spectra for  $\text{AuCH}_2^+$  ( $^1\text{A}_1$ ) including rotational band structure at 293 K both with and without including nuclear spin statistics. Figure S4 shows representative mass spectra of the ionic species formed from gold laser ablation in a flow of ethylene oxide mixed with He with and without laser irradiation at  $836\text{ cm}^{-1}$ . Figure S5 shows the spectrum for  $\text{AuCH}_2^+$  ( $^1\text{A}_1$ ) including the rotational band contours and the two lowest frequency bands blue-shifted by  $90\text{ cm}^{-1}$ . Figures S6 and S7 show comparisons of the calculated spectra for alternative precursors with the experimental spectrum.

**Table S1.** Dipole Derivatives, Principle Axes, and Moments of Inertia of AuCH<sub>2</sub><sup>+</sup> (<sup>1</sup>A<sub>1</sub>)

| Frequency<br>(cm <sup>-1</sup> ) | Coordinate<br>1 | Coordinate<br>2 | Coordinate<br>3 | IR Intensity<br>(km mol <sup>-1</sup> ) |
|----------------------------------|-----------------|-----------------|-----------------|-----------------------------------------|
| 648.26                           | -2.39E-10       | -1.61E-10       | 6.06E+00        | 36.734                                  |
| 758.59                           | -7.79E-10       | 4.59E+00        | 1.40E-10        | 21.059                                  |
| 1030.07                          | 8.10E+00        | -5.89E-10       | -5.56E-10       | 65.627                                  |
| 1393.35                          | 1.90E-10        | 1.40E-10        | -3.26E+00       | 10.612                                  |
| 3077.32                          | 4.59E-10        | -3.62E-10       | -4.45E+00       | 19.828                                  |
| 3197.60                          | 5.51E-10        | 6.59E+00        | 1.92E-10        | 43.419                                  |
| Eigenvalues                      | 6.18177         | 184.98131       | 191.16308       |                                         |
| X                                | 0               | 0               | 1               |                                         |
| Y                                | 0               | 1               | 0               |                                         |
| Z                                | 1               | 0               | 0               |                                         |

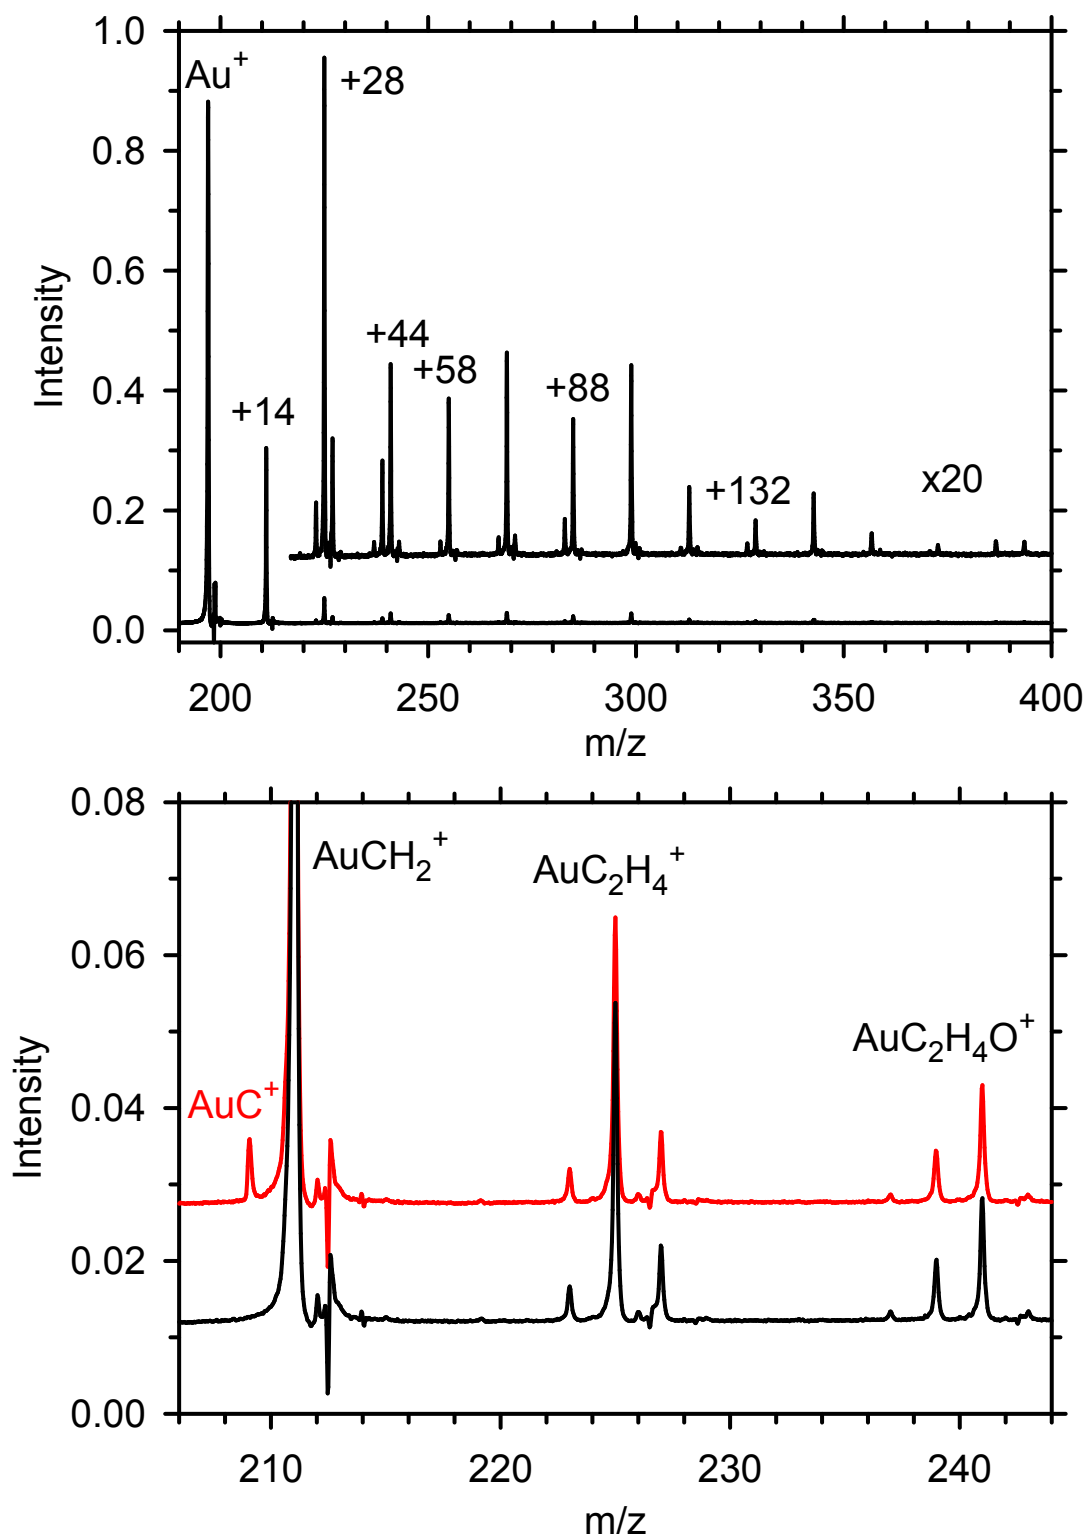

**Figure S1.** Mass spectrum of the ionic species formed from laser ablation of gold in a flow of ethylene oxide mixed with He as observed with no laser light (black trace) and with laser light (red trace) at  $1010\text{ cm}^{-1}$ . Note the appearance of  $\text{AuC}^+$  in the red trace.

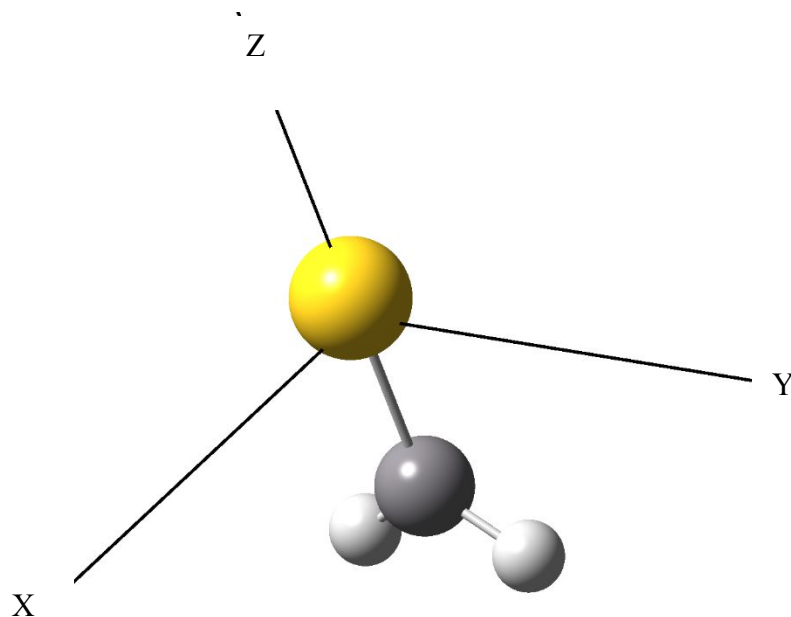

**Figure S2.** Geometric orientation of the Cartesian principle axes for which dipole derivatives and moments of inertia of  $\text{AuCH}_2^+ (^1A_1)$  were calculated.

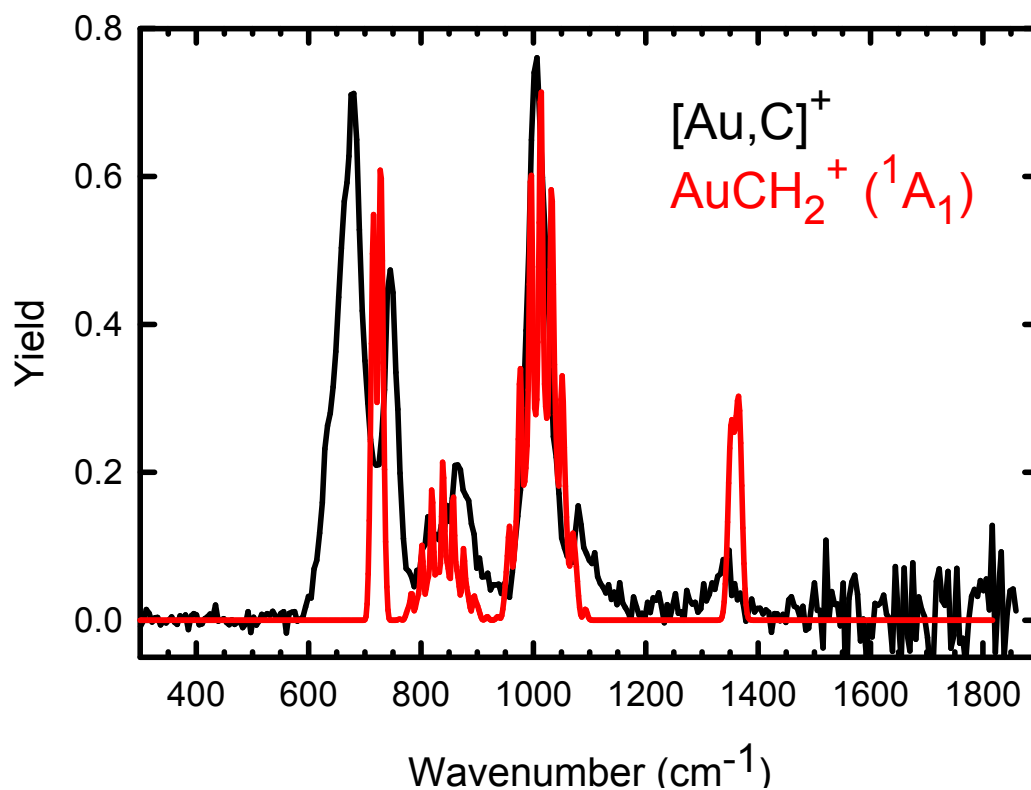

**Figure S4.** IRMPD spectrum for formation of  $[\text{Au,C}]^+$  (black) and the DFT calculated spectra including rotational band structure at 77 K for the singlet carbene  $\text{AuCH}_2^+$  (red) with the two lowest frequency bands blue-shifted by  $90 \text{ cm}^{-1}$ .

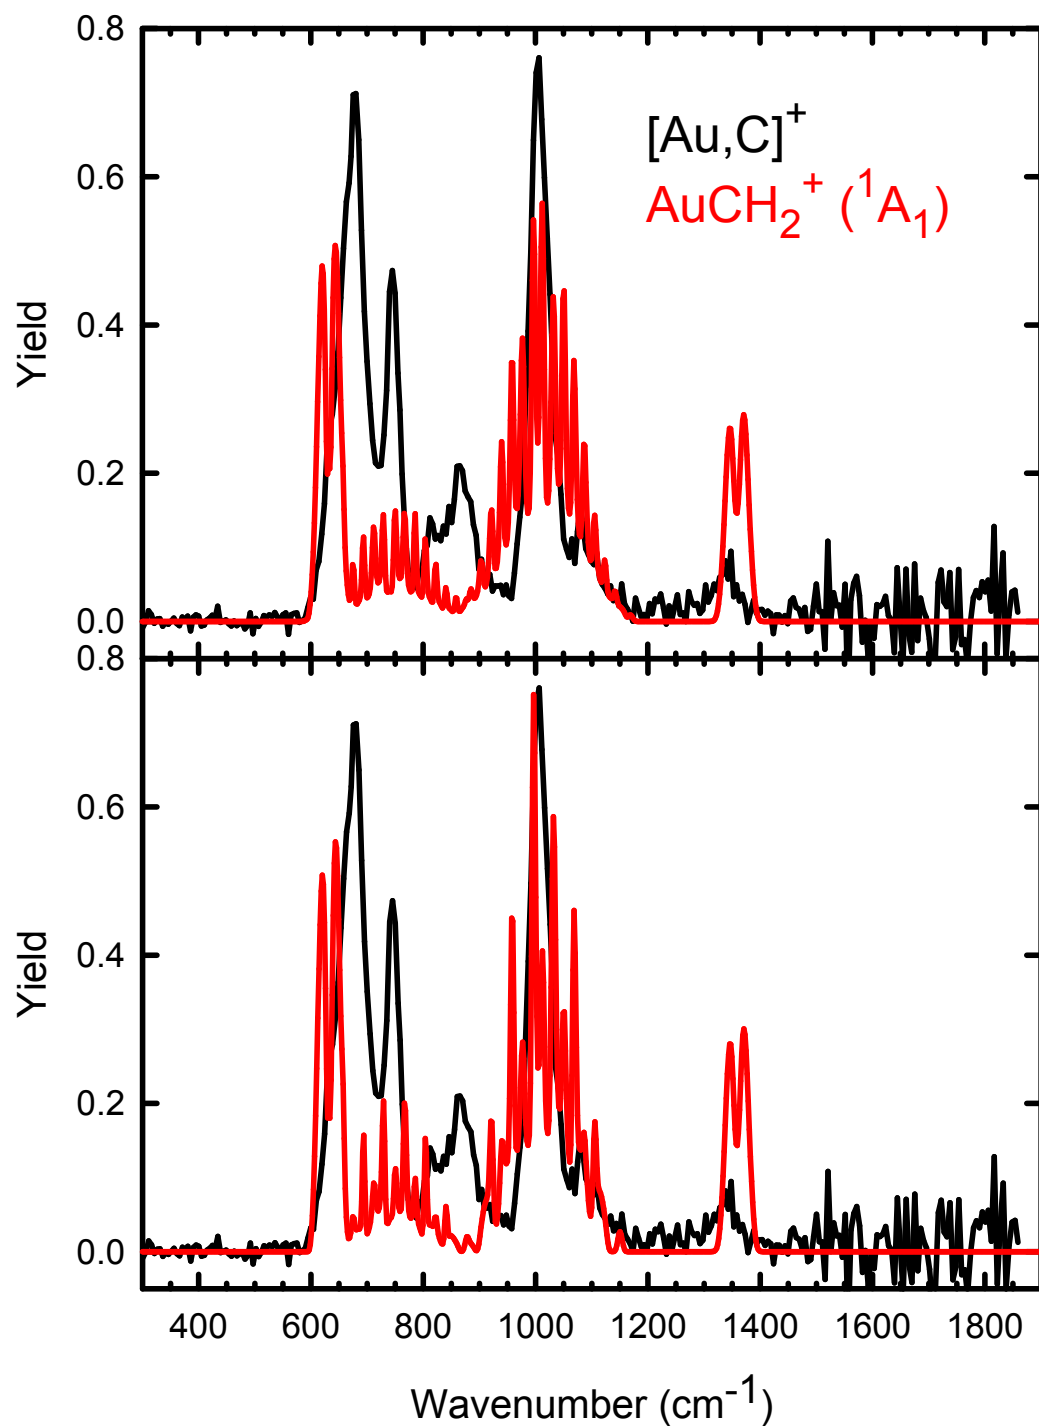

**Figure S3.** IRMPD spectra for formation of  $[\text{Au,C}]^+$  (black) and the DFT calculated spectra including rotational band structure at 293 K excluding (top panel) and including (bottom panel) nuclear spin statistics for the singlet carbene  $\text{AuCH}_2^+$  (red).

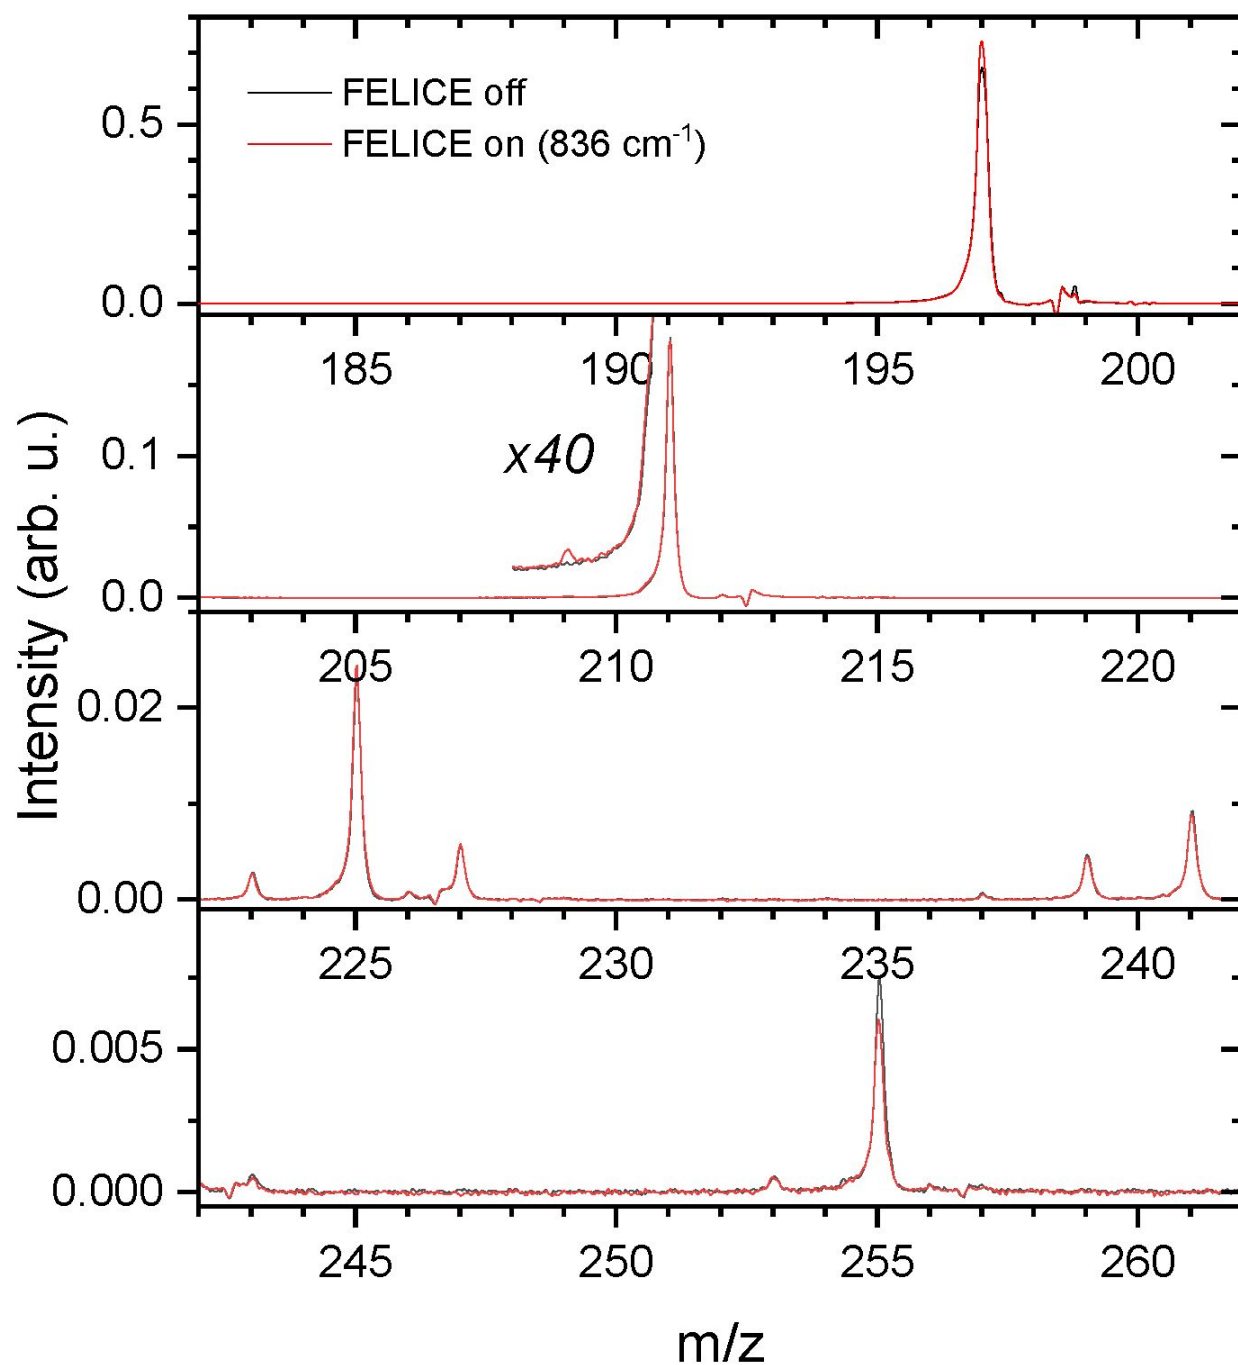

**Figure S5.** Mass spectrum of the ionic species formed from laser ablation of gold in a flow of ethylene oxide mixed with He as observed with no laser light (black trace) and with laser light (red trace) at  $836\text{ cm}^{-1}$ . Note the appearance of  $\text{AuC}^+$  at  $m/z$  209 (seen in the expansion) and the depletion of the peak at  $m/z$  255,  $\text{AuC}_3\text{H}_6\text{O}^+$ .

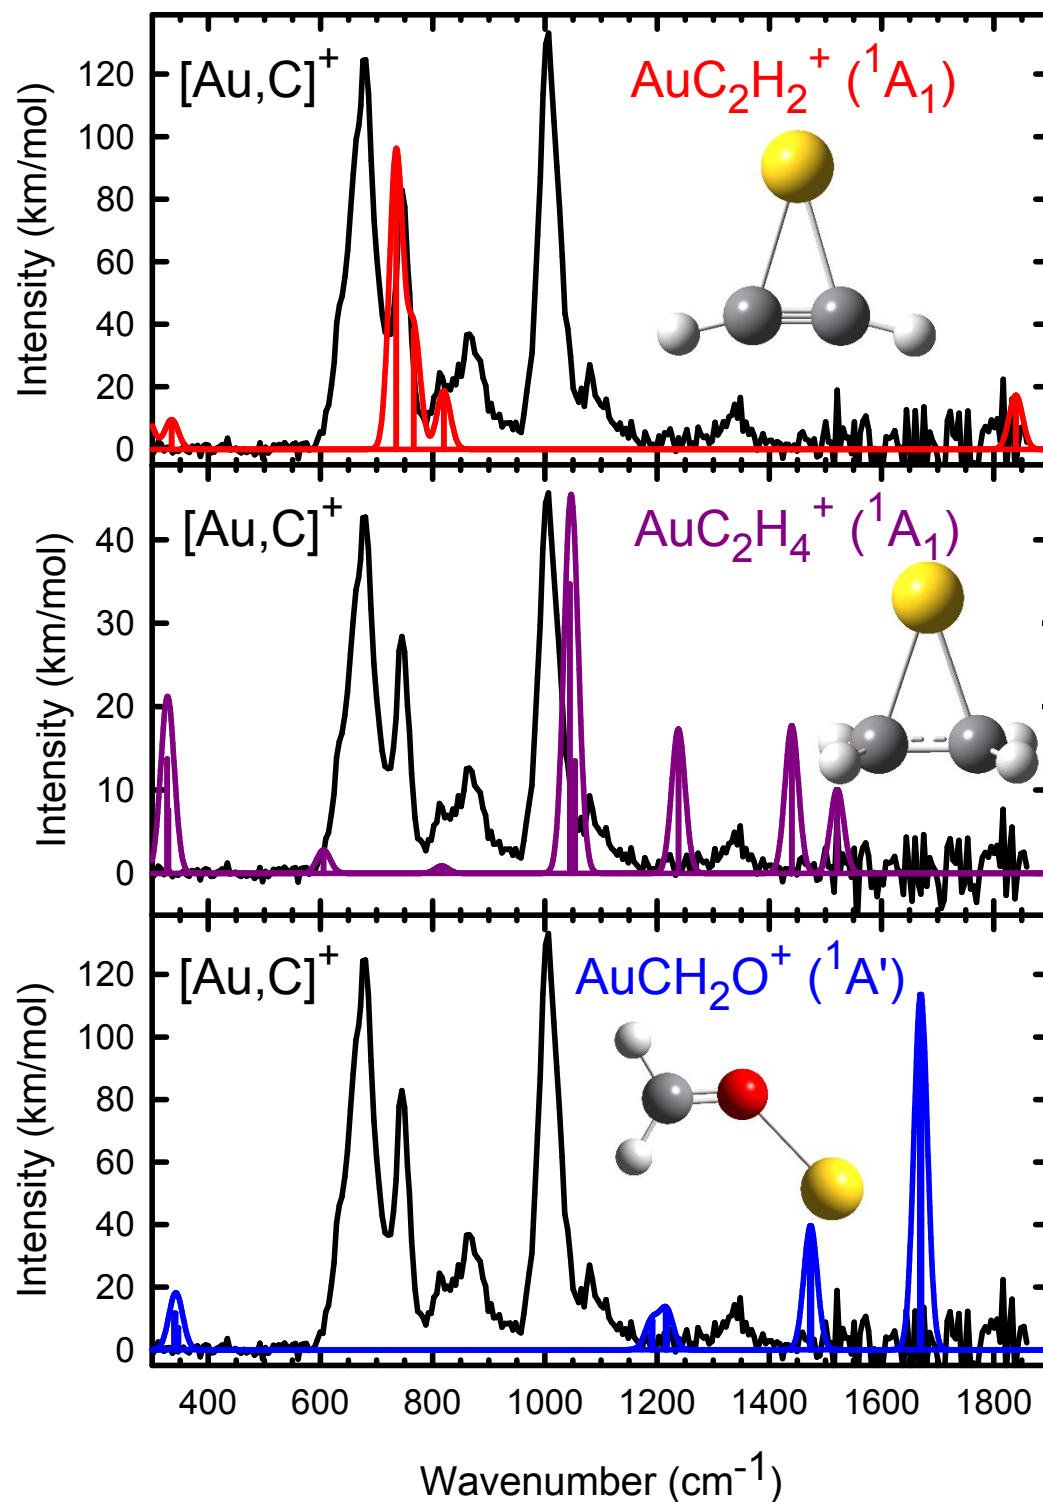

**Figure S6.** IRMPD spectra for formation of [Au,C]<sup>+</sup> (black) and the DFT calculated spectra for the metallacyclopropene, AuC<sub>2</sub>H<sub>2</sub><sup>+</sup> (<sup>1</sup>A<sub>1</sub>) (top trace, red), metallacyclopentane, AuC<sub>2</sub>H<sub>4</sub><sup>+</sup> (<sup>1</sup>A<sub>1</sub>) (middle trace, purple), and gold formaldehyde, AuCH<sub>2</sub>O<sup>+</sup> (bottom trace, blue).

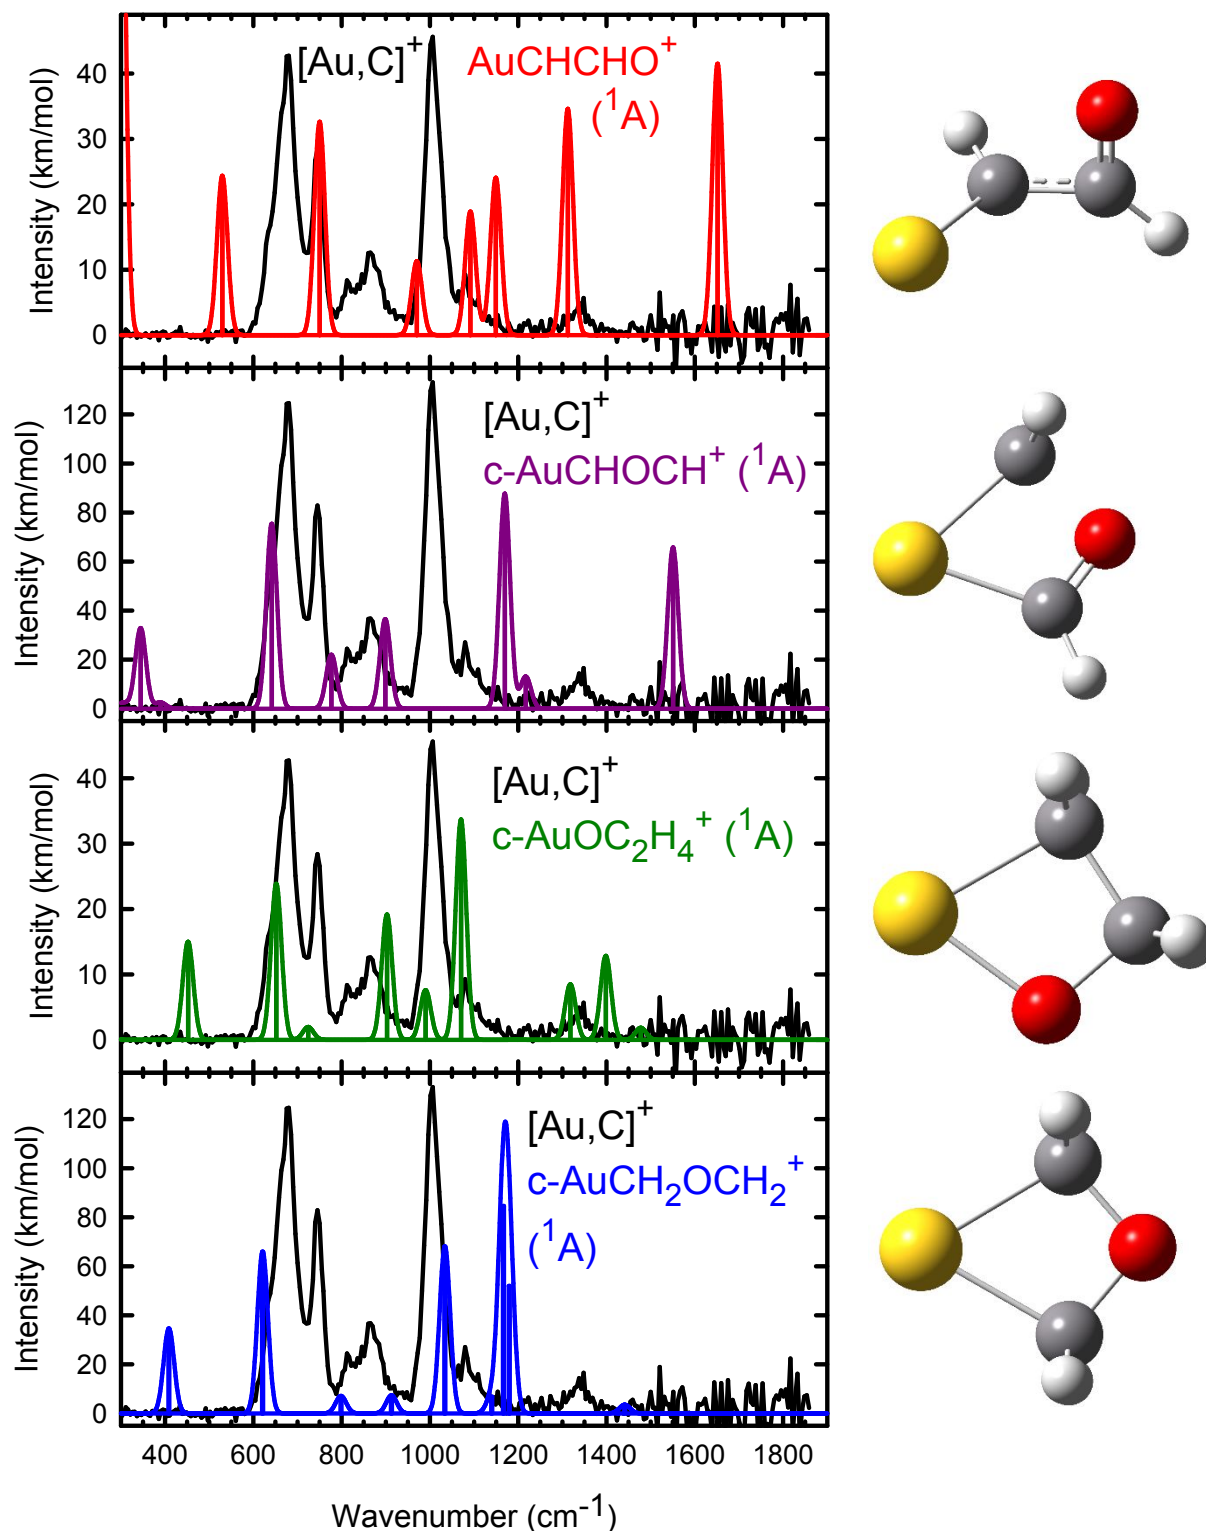

**Figure S7.** IRMPD spectra for formation of  $[\text{Au}, \text{C}]^+$  (black) and the DFT calculated spectra for  $\text{AuCHCHO}^+ (^1\text{A})$  (top trace, red), metallacyclobutene,  $c\text{-AuCHOCH}^+ (^1\text{A})$  (middle trace, purple), and metallacyclobutanes,  $c\text{-AuOC}_2\text{H}_4^+ (^1\text{A})$  (middle trace, green) and  $c\text{-AuCH}_2\text{OCH}_2^+ (^1\text{A})$  (bottom trace, blue). Structures are shown to the right.
